# Supplementary material
Source: MDPI journal article supplement (https://www.mdpi.com/2072-4292/8/5/424)
Supplement: s1 [file s1]

Supplementary Materials: PATMOS-x Cloud Climate Record Trend Sensitivity to Reanalysis Products. *Remote Sens*. 2016, *8*, Manuscript ID.

Michael Foster, Andrew Heidinger, Michael Hiley, Steve Wanzong, Andi Walther and
Denis Botambekov

1. Reanalysis Inter-Comparison

Several reanalysis fields were compared for ERA-I, MERRA and CFSR. Figures S1–S8 show the results from these inter-comparisons.

**
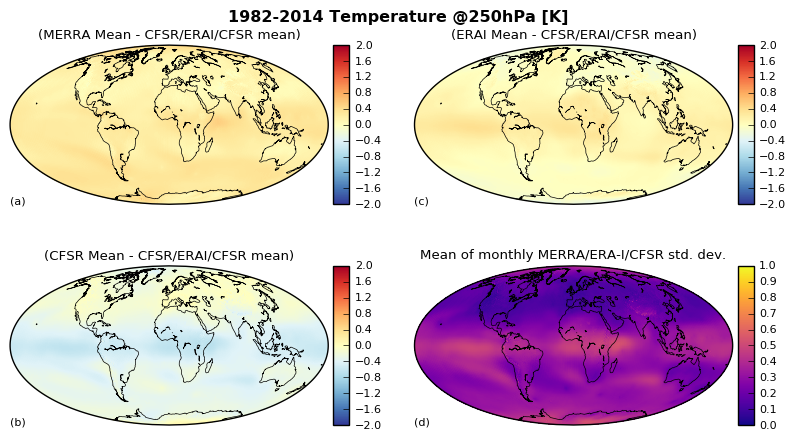
**

**Figure S1.** (**a**) Global anomaly map of MERRA 250 hPa temperature for 1982–2014, where the anomaly is the MERRA mean minus the mean from all three PATMOS-x records; (**b**) Same as (**a**) but for CFSR; (**c**) Same as (**a**) but for ERA-I; (**d**) Mean of the standard deviations of 250 hPa temperature from MERRA, ERA-I and CFSR calculated from the monthly means.


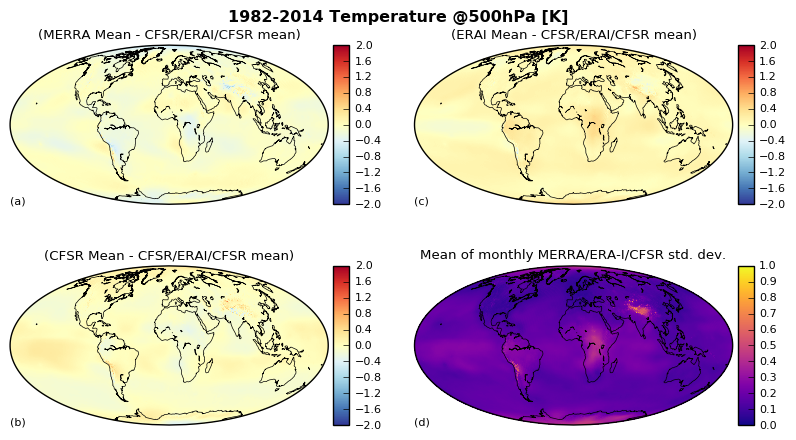


**Figure S2.** Same as Figure S1 but for 500 hPa temperature. (**a**), (**b**), (**c**), (**d**).


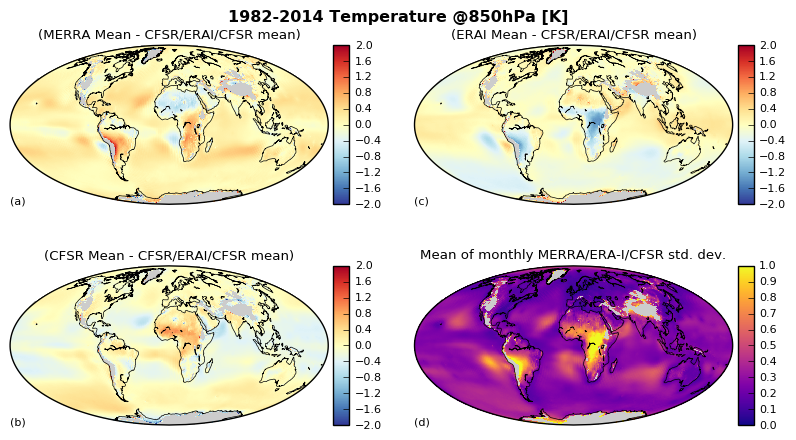


**Figure S3.** Same as Figure S1 but for 850 hPa temperature. . (**a**), (**b**), (**c**), (**d**).


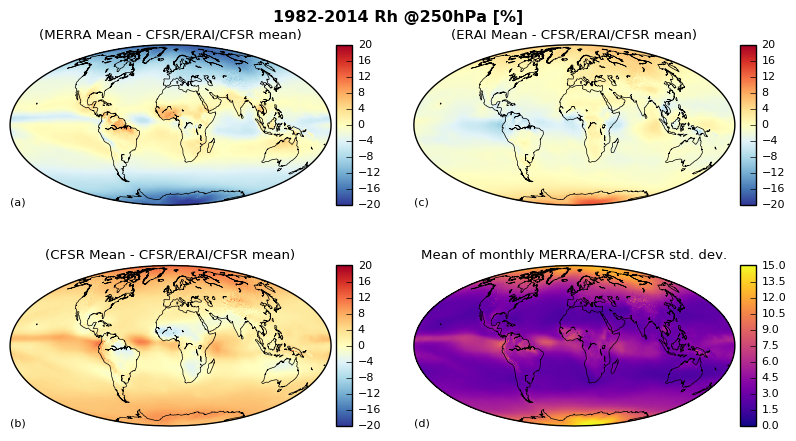


**Figure S4.** Same as Figure S1 but for 250 hPa relative humidity. . (**a**), (**b**), (**c**), (**d**).


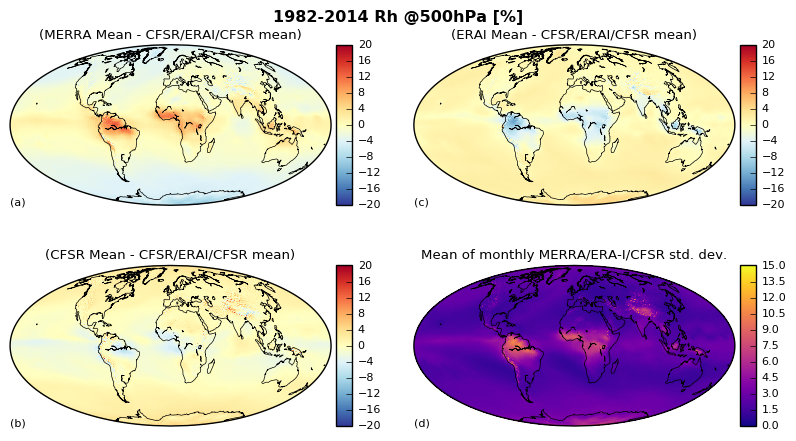


**Figure S5.** Same as Figure S1 but for 500 hPa relative humidity. . (**a**), (**b**), (**c**), (**d**).


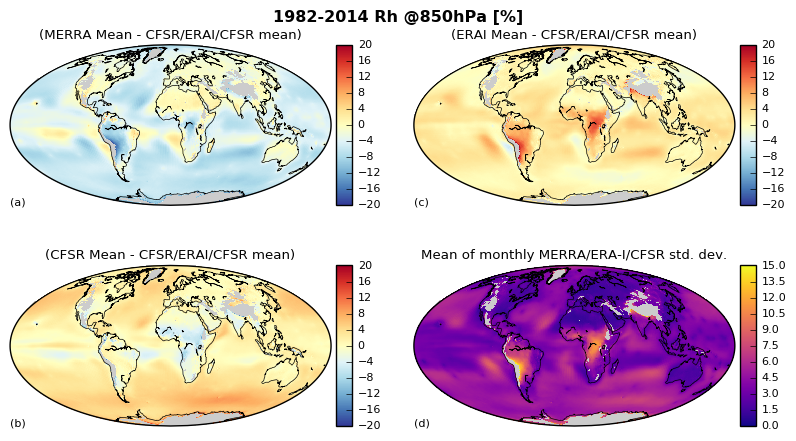


**Figure S6.** Same as Figure S1 but for 850 hPa relative humidity. . (**a**), (**b**), (**c**), (**d**).


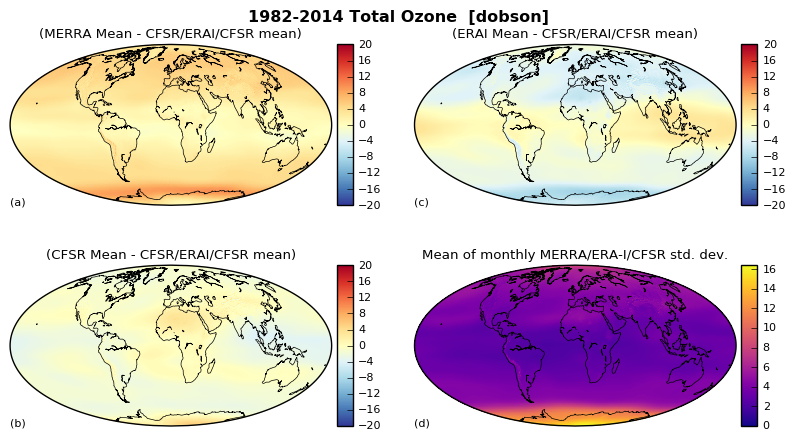


**Figure S7.** Same as Figure S1 but for total ozone. . (**a**), (**b**), (**c**), (**d**).


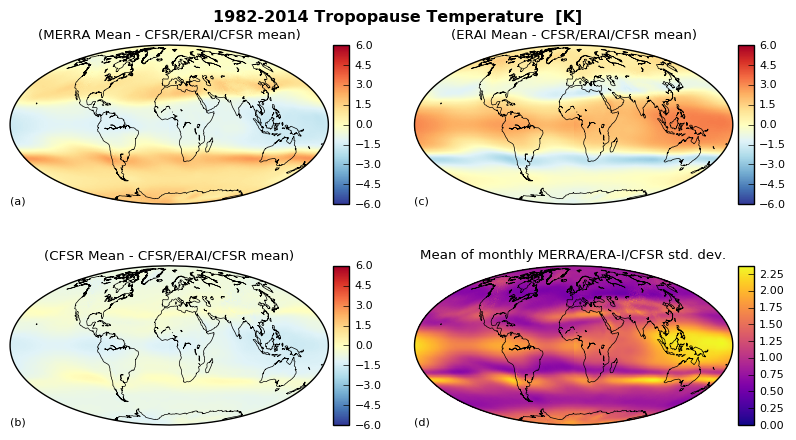


**Figure S8.** Same as Figure S1 but for tropopause temperature. . (**a**), (**b**), (**c**), (**d**).

© 2016 by the authors; licensee MDPI, Basel, Switzerland. This article is an open access article distributed under the terms and conditions of the Creative Commons by Attribution (CC-BY) license (http://creativecommons.org/licenses/by/4.0/).
